# Supplementary material
Source: Springer Nature journal article supplement (https://www.springermedizin.de/resource/supplementary/12890_2013_536_MOESM2_ESM.pdf/9505724)

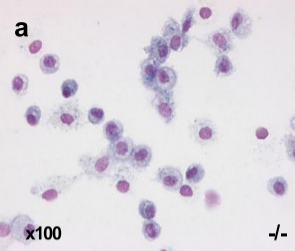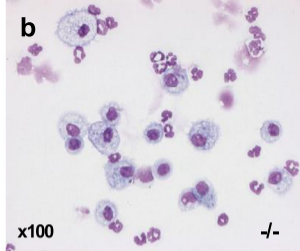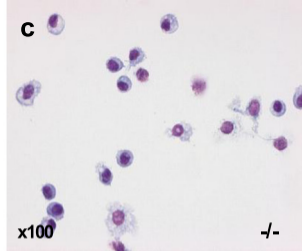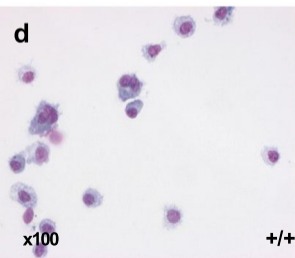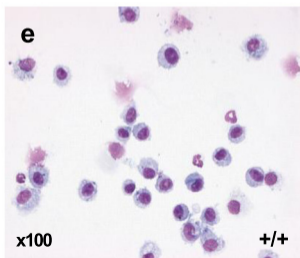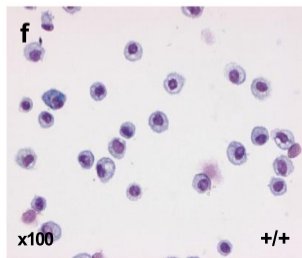

**t=0**

**t=24h**

**t=1wk**

Supplement: MOESM2 [file 9505724]
